# Supplementary material
Source: publisher site journal article supplement (https://www.spandidos-publications.com/2308/downloadSupplementary)
Supplement: Supplementary file 1 [file downloadSupplementary]

## Sheet: Table SIV
Table SIV. The enriched KEGG pathway analyzed by DAVID.
Term	KEGG pathway ID	Gene count	%	P-value *
Transcriptional misregulation in cancer	hsa05202	3	8.8	0.019
HIF-1 signaling pathway	hsa04066	2	5.9	0.12
*Modified Fisher Exact P-Value
